# Supplementary material
Source: Research Square preprint supplement (doi:10.21203/rs.3.rs-9496455/v1)
Supplement: Supplementary file 1 [file ee1c0763136fcc434fec20f1.docx]

# Supplementary Materials

Several socio-demographic measurements were taken and then tested for follow-up sensitivity analyses for our main outcomes (see *Table S1* and *S2*).

| **Table S1.** Exploratory tests to find potential demographic covariates for follow-up sensitivity analyses for each outcome. | | | | | | | | | |
| --- | --- | --- | --- | --- | --- | --- | --- | --- | --- |
|  |  | *RDS-R (DST)* | | | | *SSRT (SST)* | | | |
| **Variable** | **Test** | **r** | **df** | **X2 / F / t** | **p** | **r** | **df** | **X2 / F / t** | **p** |
| Age | Pearson's correlation | -0.110 | 98 | -1.097 | 0.276 | 0.268 | 89 | 2.624 | **0.010*** |
| # of deployments | Pearson's correlation | -0.090 | 98 | -0.893 | 0.374 | 0.172 | 89 | 1.643 | 0.104 |
| Years since last deployment | Pearson's correlation | -0.048 | 74 | -0.413 | 0.681 | 0.283 | 66 | 2.394 | 0.020 |
| Education | Kruskal-Wallis | - | 6 | 13.240 | **0.039*** | - | 2 | 9.497 | **0.009**** |
| Rank | Kruskal-Wallis | - | 2 | 4.967 | 0.083 | - | 2 | 3.608 | 0.165 |
| Branch Armed Forces | Kruskal-Wallis | - | 3 | 1.196 | 0.754 | - | 3 | 3.665 | 0.300 |
|  |  | *Go accuracy (SST)* | | | | *Stop-rate (SST)* | | | |
| **Variable** | **Test** | **r** | **df** | **X2 / F / t** | **p** | **r** | **df** | **X2 / F / t** | **p** |
| Age | Pearson's correlation | -0.373 | 89 | -3.798 | **0.000***** | 0.068 | 89 | 0.640 | 0.524 |
| # of deployments | Pearson's correlation | -0.137 | 89 | -1.308 | 0.194 | -0.038 | 89 | -0.358 | 0.721 |
| Years since last deployment | Pearson's correlation | -0.280 | 66 | -2.372 | **0.021*** | -0.050 | 66 | -0.408 | 0.684 |
| Education | Kruskal-Wallis | - | 2 | 18.656 | **0.000***** | - | 2 | 6.323 | **0.042*** |
| Rank | Kruskal-Wallis | - | 2 | 10.900 | **0.004**** | - | 2 | 5.847 | 0.054 |
| Branch Armed Forces | Kruskal-Wallis | - | 3 | 7.377 | 0.061 | - | 3 | 1.365 | 0.714 |
|  |  | *Mean adjusted pumps (BART)* | | | | *Pop rate (BART)* | | | |
| **Variable** | **Test** | **r** | **df** | **X2 / F / t** | **p** | **r** | **df** | **X2 / F / t** | **p** |
| Age | Pearson's correlation | 0.049 | 98 | 0.483 | 0.630 | 0.005 | 98 | 0.049 | 0.961 |
| # of deployments | Pearson's correlation | 0.043 | 98 | 0.421 | 0.674 | -0.046 | 98 | -0.456 | 0.650 |
| Years since last deployment | Pearson's correlation | 0.086 | 74 | 0.740 | 0.462 | 0.071 | 74 | 0.611 | 0.543 |
| Education | Kruskal-Wallis | - | 6 | 1.940 | 0.925 | - | 6 | 4.931 | 0.553 |
| Rank | Kruskal-Wallis | - | 2 | 0.814 | 0.666 | - | 2 | 0.652 | 0.722 |
| Branch Armed Forces | Kruskal-Wallis | - | 3 | 3.828 | 0.281 | - | 3 | 4.487 | 0.213 |
| *: p-value <.05 | | | | | | | | | |
| **: p-value <.01 | | | | | | | | | |
| ***: p-value <.001 | | | | | | | | | |

| **Table S2.** Exploratory tests to find potential questionnaire score covariates for follow-up sensitivity analyses for each outcome. | | | | | | | | |
| --- | --- | --- | --- | --- | --- | --- | --- | --- |
|  | *RDS-R (DST)* | | | | *SSRT (SST)* | | | |
| **Questionnaire** | **r** | **df** | **t** | **p** | **r** | **df** | **t** | **p** |
| PID-5 negative affect | -0.015 | 98 | -0.151 | 0.880 | 0.016 | 89 | 0.153 | 0.879 |
| PID-5 Detachment | -0.088 | 98 | -0.870 | 0.386 | 0.138 | 89 | 1.311 | 0.193 |
| PID-5 Antagonism | 0.124 | 98 | 1.237 | 0.219 | -0.061 | 89 | -0.573 | 0.568 |
| PID-5 Disinhibition | -0.061 | 98 | -0.600 | 0.550 | -0.009 | 89 | -0.082 | 0.935 |
| PID-5 Psychoticism | -0.120 | 98 | -1.194 | 0.235 | 0.077 | 89 | 0.724 | 0.471 |
| BAS drive | -0.090 | 98 | -0.897 | 0.372 | -0.042 | 89 | -0.397 | 0.692 |
| BAS fun-seeking | 0.010 | 98 | 0.104 | 0.918 | 0.029 | 89 | 0.273 | 0.785 |
| BAS reward responsiveness | 0.135 | 98 | 1.349 | 0.181 | -0.055 | 89 | -0.518 | 0.606 |
| BIS | -0.047 | 98 | -0.463 | 0.644 | -0.052 | 89 | -0.492 | 0.624 |
| PSS-14 | -0.062 | 98 | -0.618 | 0.538 | -0.054 | 89 | -0.509 | 0.612 |
|  | *Go accuracy (SST)* | | | | *Stop-rate (SST)* | | | |
| **Variable** | **r** | **df** | **t** | **p** | **r** | **df** | **t** | **p** |
| PID-5 negative affect | 0.120 | 89 | 1.144 | 0.256 | -0.127 | 89 | -1.205 | 0.232 |
| PID-5 Detachment | -0.202 | 89 | -1.942 | 0.055 | -0.181 | 89 | -1.739 | 0.085 |
| PID-5 Antagonism | 0.077 | 89 | 0.725 | 0.471 | 0.025 | 89 | 0.239 | 0.812 |
| PID-5 Disinhibition | 0.107 | 89 | 1.016 | 0.312 | -0.120 | 89 | -1.143 | 0.256 |
| PID-5 Psychoticism | 0.001 | 89 | 0.011 | 0.991 | -0.100 | 89 | -0.951 | 0.344 |
| BAS drive | -0.034 | 89 | -0.323 | 0.748 | 0.009 | 89 | 0.088 | 0.930 |
| BAS fun-seeking | 0.184 | 89 | 1.769 | 0.080 | 0.066 | 89 | 0.622 | 0.536 |
| BAS reward responsiveness | 0.149 | 89 | 1.422 | 0.158 | -0.044 | 89 | -0.418 | 0.677 |
| BIS | 0.014 | 89 | 0.128 | 0.898 | -0.178 | 89 | -1.710 | 0.091 |
| PSS-14 | 0.021 | 89 | 0.202 | 0.840 | -0.101 | 89 | -0.957 | 0.341 |
|  | *Mean adjusted pumps (BART)* | | | | *Pop rate (BART)* | | | |
| **Variable** | **r** | **df** | **t** | **p** | **r** | **df** | **t** | **p** |
| PID-5 negative affect | -0.057 | 98 | -0.563 | 0.575 | -0.011 | 98 | -0.111 | 0.912 |
| PID-5 Detachment | -0.085 | 98 | -0.849 | 0.398 | -0.047 | 98 | -0.464 | 0.644 |
| PID-5 Antagonism | 0.003 | 98 | 0.028 | 0.978 | 0.019 | 98 | 0.185 | 0.854 |
| PID-5 Disinhibition | 0.008 | 98 | 0.074 | 0.941 | -0.000 | 98 | -0.004 | 0.997 |
| PID-5 Psychoticism | -0.029 | 98 | -0.287 | 0.775 | 0.066 | 98 | 0.654 | 0.515 |
| BAS drive | 0.029 | 98 | 0.288 | 0.774 | 0.050 | 98 | 0.491 | 0.624 |
| BAS fun-seeking | 0.007 | 98 | 0.065 | 0.949 | 0.049 | 98 | 0.487 | 0.627 |
| BAS reward responsiveness | 0.128 | 98 | 1.275 | 0.205 | 0.051 | 98 | 0.504 | 0.616 |
| BIS | -0.084 | 98 | -0.831 | 0.408 | -0.141 | 98 | -1.412 | 0.161 |
| PSS-14 | -0.206 | 98 | -2,085 | **0.040*** | -0.263 | 98 | -2.700 | **0.008**** |
| *: p-value <.05 | | | | | | | | |
| **: p-value <.01 | | | | | | | | |
| ***: p-value <.001 | | | | | | | | |

| **Table S3.** Descriptives and results of Shapiro-Wilk tests of normality and Levene's test of equal variance for all main outcomes. The DST and BART included all 100 participants. The SST included 91 participants. | | | | | | | | | |
| --- | --- | --- | --- | --- | --- | --- | --- | --- | --- |
|  |  |  |  |  | *Shapiro-Wilk test* | | *Levene's test* | | |
| **Task** | **Outcome** | **Condition** | **n** | **Mean (SD)** | **W** | **p** | **df** | **F** | **p** |
| DST | RDS-R | PLAC | 24 | 18.1 (3.39) | 0.957 | 0.384 |  |  |  |
|  |  | YOH | 25 | 18.1 (2.45) | 0.939 | 0.140 |  |  |  |
|  |  | CORT | 26 | 18.5 (2.23) | 0.931 | 0.081 |  |  |  |
|  |  | YOH/CORT | 25 | 18.3 (3.44) | 0.937 | 0.125 |  |  |  |
|  |  |  |  |  |  |  | 3 (96) | 2.046 | 0.113 |
| SST | SSRT | PLAC | 22 | 330 (20.3) | 0.960 | 0.497 |  |  |  |
|  |  | YOH | 23 | 333 (23.6) | 0.939 | 0.170 |  |  |  |
|  |  | CORT | 24 | 325 (21.7) | 0.986 | 0.975 |  |  |  |
|  |  | YOH/CORT | 22 | 319 (28.1) | 0.955 | 0.395 |  |  |  |
|  |  |  |  |  |  |  | 3 (87) | 0.234 | 0.872 |
|  | Go accuracy | PLAC | 22 | 0.786 (0.182) | 0.846 | **0.003**** |  |  |  |
|  |  | YOH | 23 | 0.811 (0.163) | 0.835 | **0.001**** |  |  |  |
|  |  | CORT | 24 | 0.819 (0.120) | 0.818 | **0.001***** |  |  |  |
|  |  | YOH/CORT | 22 | 0.835 (0.159) | 0.801 | **0.001***** |  |  |  |
|  |  |  |  |  |  |  | 3 (87) | 0.406 | 0.749 |
|  | Succesful stop-rate | PLAC | 22 | 0.827 (0.112) | 0.872 | **0.009**** |  |  |  |
|  |  | YOH | 23 | 0.832 (0.089) | 0.930 | 0.108 |  |  |  |
|  |  | CORT | 24 | 0.858 (0.091) | 0.951 | 0.290 |  |  |  |
|  |  | YOH/CORT | 22 | 0.862 (0.086) | 0.966 | 0.621 |  |  |  |
|  |  |  |  |  |  |  | 3 (87) | 0.347 | 0.791 |
| BART | Mean adjusted pumps | PLAC | 24 | 10.4 (3.88) | 0.955 | 0.346 |  |  |  |
|  |  | YOH | 25 | 13.3 (4.82) | 0.802 | **0.000***** |  |  |  |
|  |  | CORT | 26 | 10.8 (2.97) | 0.945 | 0.175 |  |  |  |
|  |  | YOH/CORT | 25 | 12.7 (4.81) | 0.827 | **0.001***** |  |  |  |
|  |  |  |  |  |  |  | 3 (96) | 0.315 | 0.815 |
|  | Pop rate | PLAC | 24 | 0.405 (0.141) | 0.938 | 0.146 |  |  |  |
|  |  | YOH | 25 | 0.499 (0.115) | 0.934 | 0.107 |  |  |  |
|  |  | CORT | 26 | 0.431 (0.098) | 0.992 | 0.999 |  |  |  |
|  |  | YOH/CORT | 25 | 0.493 (0.154) | 0.942 | 0.162 |  |  |  |
|  |  |  |  |  |  |  | 3 (96) | 1.620 | 0.189 |
| *: p-value <.05 | | | | | | | | | |
| **: p-value <.01 | | | | | | | | | |
| ***: p-value <.001 | | | | | | | | | |

| **Table S4** All linear mixed models of time spent during span trials of the DST. Each model added another predictor, affecting the AIC, BIC and Log Likelihood. Model comparisons done with log-likelihood tests: model 1 represents the baseline model, while X2 values reflect comparisons to preceding model. All models included 100 participants. | | | | | | | | | |
| --- | --- | --- | --- | --- | --- | --- | --- | --- | --- |
| **Model** | **Fixed effects** | **Random effects** | **AIC** | **BIC** | **LogLik** | **ΔAIC** | **X2** | **df** | **p** |
| 1 | YOH * CORT | Intercept participant | 11878 | 11912 | -5932.8 | - | - | - | - |
| 2 | - | Slope trial number | 11384 | 11430 | -5684.2 | 494 | 497.18 | 2 | **0.000***** |
| 3 | Trial number | - | 11046 | 11102 | -5512.8 | 338 | 342.87 | 2 | **0.000***** |
| 4 | - | Uncorrelated slope | 11149 | 11200 | -5565.7 | -103 | - | - | **-** |
| 5 | Span type | - | 11033 | 11090 | -5506.7 | 116 | 118.05 | 1 | **0.000***** |
| 6 | Trial number * Span type | - | 10919 | 10987 | -5447.5 | 114 | 118.4 | 2 | **0.000***** |
| 7 | YOH * Span type + CORT * Span Type | - | 10910 | 11001 | -5439.1 | 9 | 16.788 | 4 | **0.002**** |
| *: p-value <.05 | | | | | | | | | |
| **: p-value <.01 | | | | | | | | | |
| ***: p-value <.001 | | | | | | | | | |

| **Table S5.** Results of an ANOVA and ANCOVA on the total RDS-R of the DST. Education was added as covariate to explain possible variance. Both tests included 100 participants. | | | | | |
| --- | --- | --- | --- | --- | --- |
| **Test** | **Factor** | **df** | **SS** | **F** | **p** |
| ANOVA | YOH | 1 | 0.360 | 0.042 | 0.837 |
|  | CORT | 1 | 2.349 | 0.276 | 0.601 |
|  | YOH * CORT | 1 | 0.285 | 0.033 | 0.855 |
|  | Residuals | 96 | 817.167 |  |  |
| ANCOVA | YOH | 1 | 0.219 | 0.028 | 0.867 |
|  | CORT | 1 | 0.004 | 0.001 | 0.981 |
|  | Education | 6 | 115.895 | 2.479 | **0.029*** |
|  | YOH * CORT | 1 | 4.297 | 0.551 | 0.460 |
|  | Residuals | 90 | 701.272 |  |  |
| *: p-value <.05 | | | | | |
| **: p-value <.01 | | | | | |
| ***: p-value <.001 | | | | | |

| **Table S6** Results of a MANOVA and MANCOVA on the SSRT, go accuracy, and stop-rate of the SST. Several covariates were added to explain possible variance. Both tests included 91 participants. | | | | | |
| --- | --- | --- | --- | --- | --- |
| **Test** | **Factor** | **df** | **W** | **F** | **p** |
| MANOVA | YOH | 1 | 0.995 | 0.153 | 0.928 |
|  | CORT | 1 | 0.949 | 1.508 | 0.218 |
|  | YOH * CORT | 1 | 0.985 | 0.442 | 0.724 |
|  | Residuals | 87 |  |  |  |
| MANCOVA | YOH | 1 | 0.934 | 1.258 | 0.298 |
|  | CORT | 1 | 0.936 | 1.199 | 0.319 |
|  | Age | 1 | 0.800 | 4.424 | **0.008**** |
|  | Years since deployment | 1 | 0.923 | 1.479 | 0.231 |
|  | Education | 2 | 0.761 | 2.580 | **0.023*** |
|  | Rank | 2 | 0.930 | 0.655 | 0.686 |
|  | Branch of Armed Forces | 3 | 0.835 | 1.107 | 0.363 |
|  | YOH * CORT | 1 | 0.912 | 1.708 | 0.176 |
|  | Residuals | 55 |  |  |  |
|  | *: p-value <.05 | | | | |
|  | **: p-value <.01 | | | | |
|  | ***: p-value <.001 | | | | |
